# Supplementary material for: U-Shaped Tube Based Liquid–Solid Triboelectric Nanogenerator for Harvesting Unutilized Compressed Air Energy
Source: MDPI journal article supplement (doi:10.3390/mi14112057), 2023-11-02
Supplement: s1 [file s1]

Supporting Information

# **U-Shaped Tube Based Liquid–Solid Triboelectric Nanogenerator for Harvesting Unutilized Compressed Air Energy**

**Xuhang Cai, Zhijian Liu \*, Jingming Dong \*, Haoji Li, Jiamu Han, Jiaming Huang and Haotian Chen**

Marine Engineering College, Dalian Maritime University, Dalian 116026, China;  
dmucxh@dlmu.edu.cn (X.C.); 0741lhj@dlmu.edu.cn (H.L.);  
han0814@dlmu.edu.cn (J.H.); jiaming\_huang@dlmu.edu.cn (J.H.);  
hotachen@dlmu.edu.cn (H.C.)

\* Correspondence: liuzhijian@dlmu.edu.cn (Z.L.); dmudjm@dlmu.edu.cn (J.D.)

## Supporting files

Supporting Figures: **Figure S1-S4**

Supporting Video: **Video S1-S2**

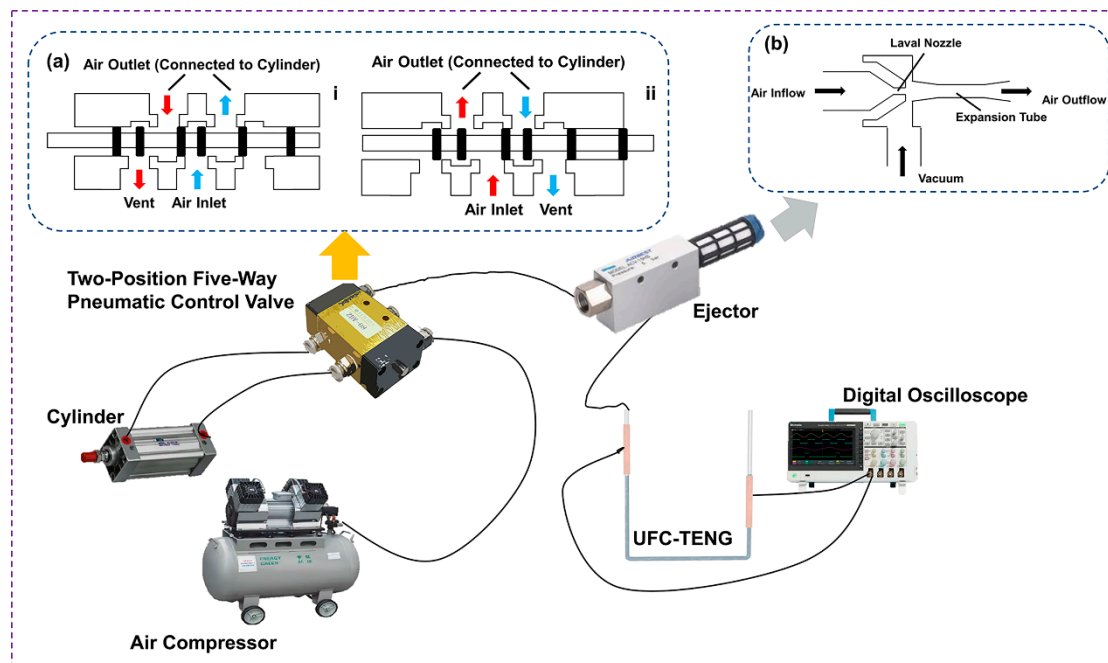

**Figure S1** Schematic diagram of the UFC-TENG testing system. (a) Schematic diagram of the two-position five-way pneumatic control valve. (b) Schematic diagram of the ejector.

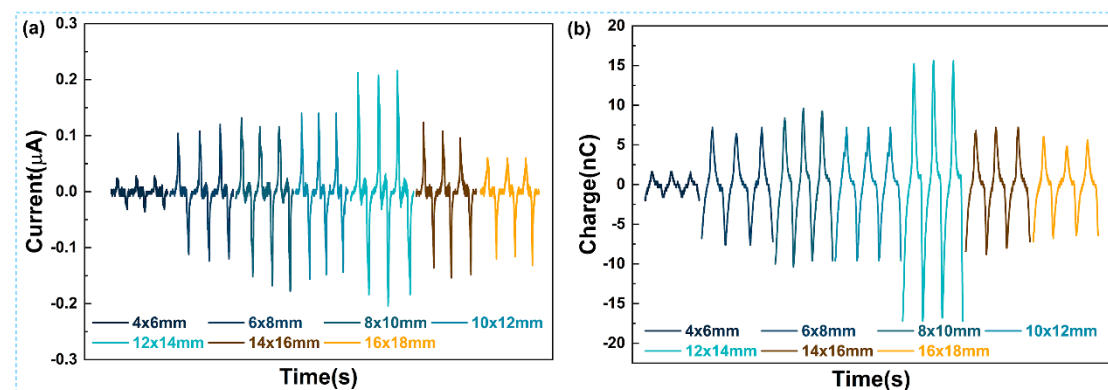

**Figure S2** Current (a) and charges (b) of the UFC-TENG with different inner and outer diameters.

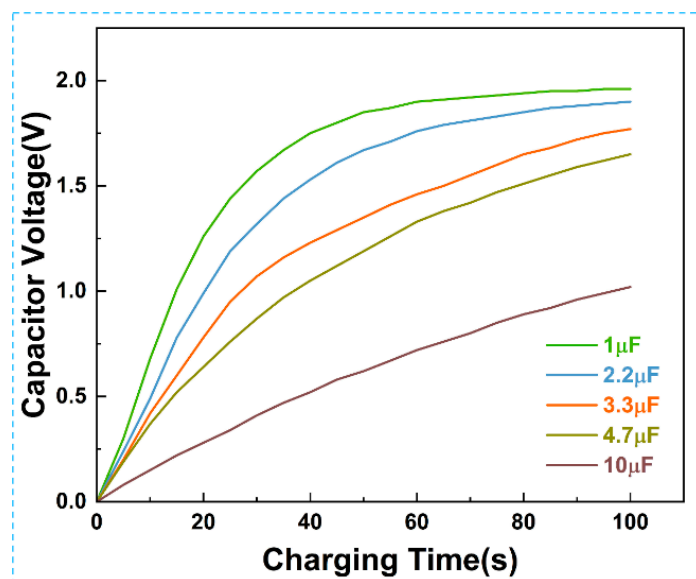

Figure S3 Charging curves of different capacitors.

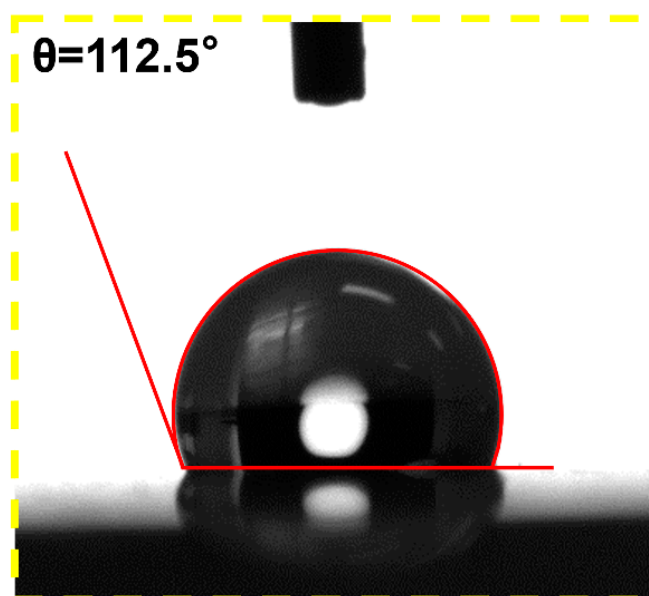

Figure S4 Contact angle between FEP and water.

### **Supporting Video**

**Video S1** Demonstrate that the UFC-TENG is used as a DC power supply to light up LEDs after full wave rectifier circuit.

**Video S2** Demonstrate that the UFC-TENG is used as a signal collector, which is amplified by triodes and converted into electrical signals.
